# Supplementary material
Source: MDPI journal article supplement (https://www.mdpi.com/2073-4441/10/12/1869)
Supplement: s1 [file s1]

# Supplementary Materials: Locating Spatial Opportunities for Nature-Based Solutions: A River Landscape Application

Paulina Guerrero <sup>1,2,\*</sup>, Dagmar Haase <sup>2,3</sup> and Christian Albert <sup>1</sup>

<sup>1</sup> Institute of Environmental Planning, Leibniz Universität Hannover, Herrenhäuser Str. 2, 30419 Hannover, Germany; albert@umwelt.uni-hannover.de

<sup>2</sup> Department of Geography, Humboldt University of Berlin, Rudower Chausee 16, 10099 Berlin, Germany; dagmar.haase@ufz.de

<sup>3</sup> Department of Computational Landscape Ecology, Helmholtz Centre for Environmental Research—UFZ, Permoser Str. 15, 04318 Leipzig, Germany

\* Correspondence: guerrero@umwelt.uni-hannover.de

**Table S1.** Land Use permeability distinction.

| Criteria             | Land Use                                                                                                                  |
|----------------------|---------------------------------------------------------------------------------------------------------------------------|
| Permeable            | Sport and recreation, cemetery, train track, agriculture, vegetation, forest, meadow, wetland, open vegetation-less area. |
| Impermeable (sealed) | Built-up areas (housing, transport, trade and industry), landfill, construction.                                          |

**Table S2.** Comparison of HLU criteria with other referenced classifications and methods [14,30,34].

| Our Criteria             | Our Approach                                                                                                                                                                                                                                                                                                                                          | Referenced Approach 1:<br>Rosgen River Classification                                                                                                                                                                  | Referenced Approach 2:<br>Montgomery and Buffington Stream Classification | Referenced Approach 3:<br>Haase & Gläser 2009                                                                        |
|--------------------------|-------------------------------------------------------------------------------------------------------------------------------------------------------------------------------------------------------------------------------------------------------------------------------------------------------------------------------------------------------|------------------------------------------------------------------------------------------------------------------------------------------------------------------------------------------------------------------------|---------------------------------------------------------------------------|----------------------------------------------------------------------------------------------------------------------|
| Soil                     | Organic and alluvial                                                                                                                                                                                                                                                                                                                                  | Gravel to silt-clay (channel material)                                                                                                                                                                                 | Fluvial Sediments*<br>General classification: 0.2–0.001,                  | Flood loam sediments**                                                                                               |
| Topography               | Relief energy (slope) $\leq 0.03$                                                                                                                                                                                                                                                                                                                     | General classification: $>0.1$ –0.005,<br>Flatter valley morphology: 0.04–0.005                                                                                                                                        | Flatter valley morphology (Braided to plane-bed rivers): 0.001–0.03       | 0–0.05                                                                                                               |
| Hydrology                | Distance to river $\leq 5$ km (includes bankfull discharge, valley morphology and flood risk estimations)                                                                                                                                                                                                                                             | Not specified since classification refers to rivers and not the floodplain.                                                                                                                                            | N/A (Idem)                                                                | Urban delimitation                                                                                                   |
| Advantages/Disadvantages | Advantage: Our approach has the advantage of using functional criteria for HLU delineation as a first and rapid assessment of potential sites for NBS.<br>Disadvantage: The method we apply is not detailed enough to support actual implementation, but needs to be amended with additional analyses at later stages of the actual planning process. | Advantage: While the focus is on river, the classification is inclusive of the floodplain and valley morphology which substantiates the three HLU criteria.<br>Disadvantage: No specific indication of river distance. | Idem                                                                      | Advantage: Includes remnant floodplain criteria.<br>Disadvantage: Urban focus, thus river distance is not specified. |

\* sediment transported by water. \*\* fine-grained material, remnants of rivers.

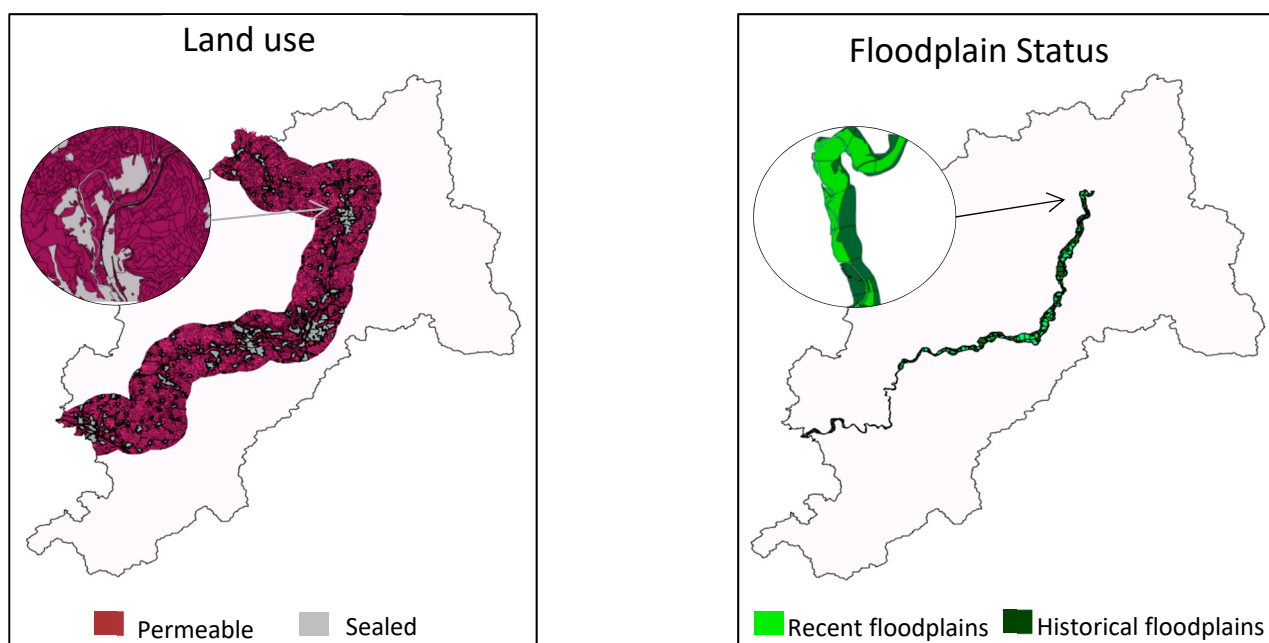

**Figure S1.** Differentiation of land use and historical floodplain status visualized.
